# Supplementary material for: Antibiotic Resistance Awareness among Undergraduate Students in Quito, Ecuador
Source: MDPI journal article supplement (doi:10.3390/antibiotics11020197), 2022-02-03
Supplement: s1 [file s1]

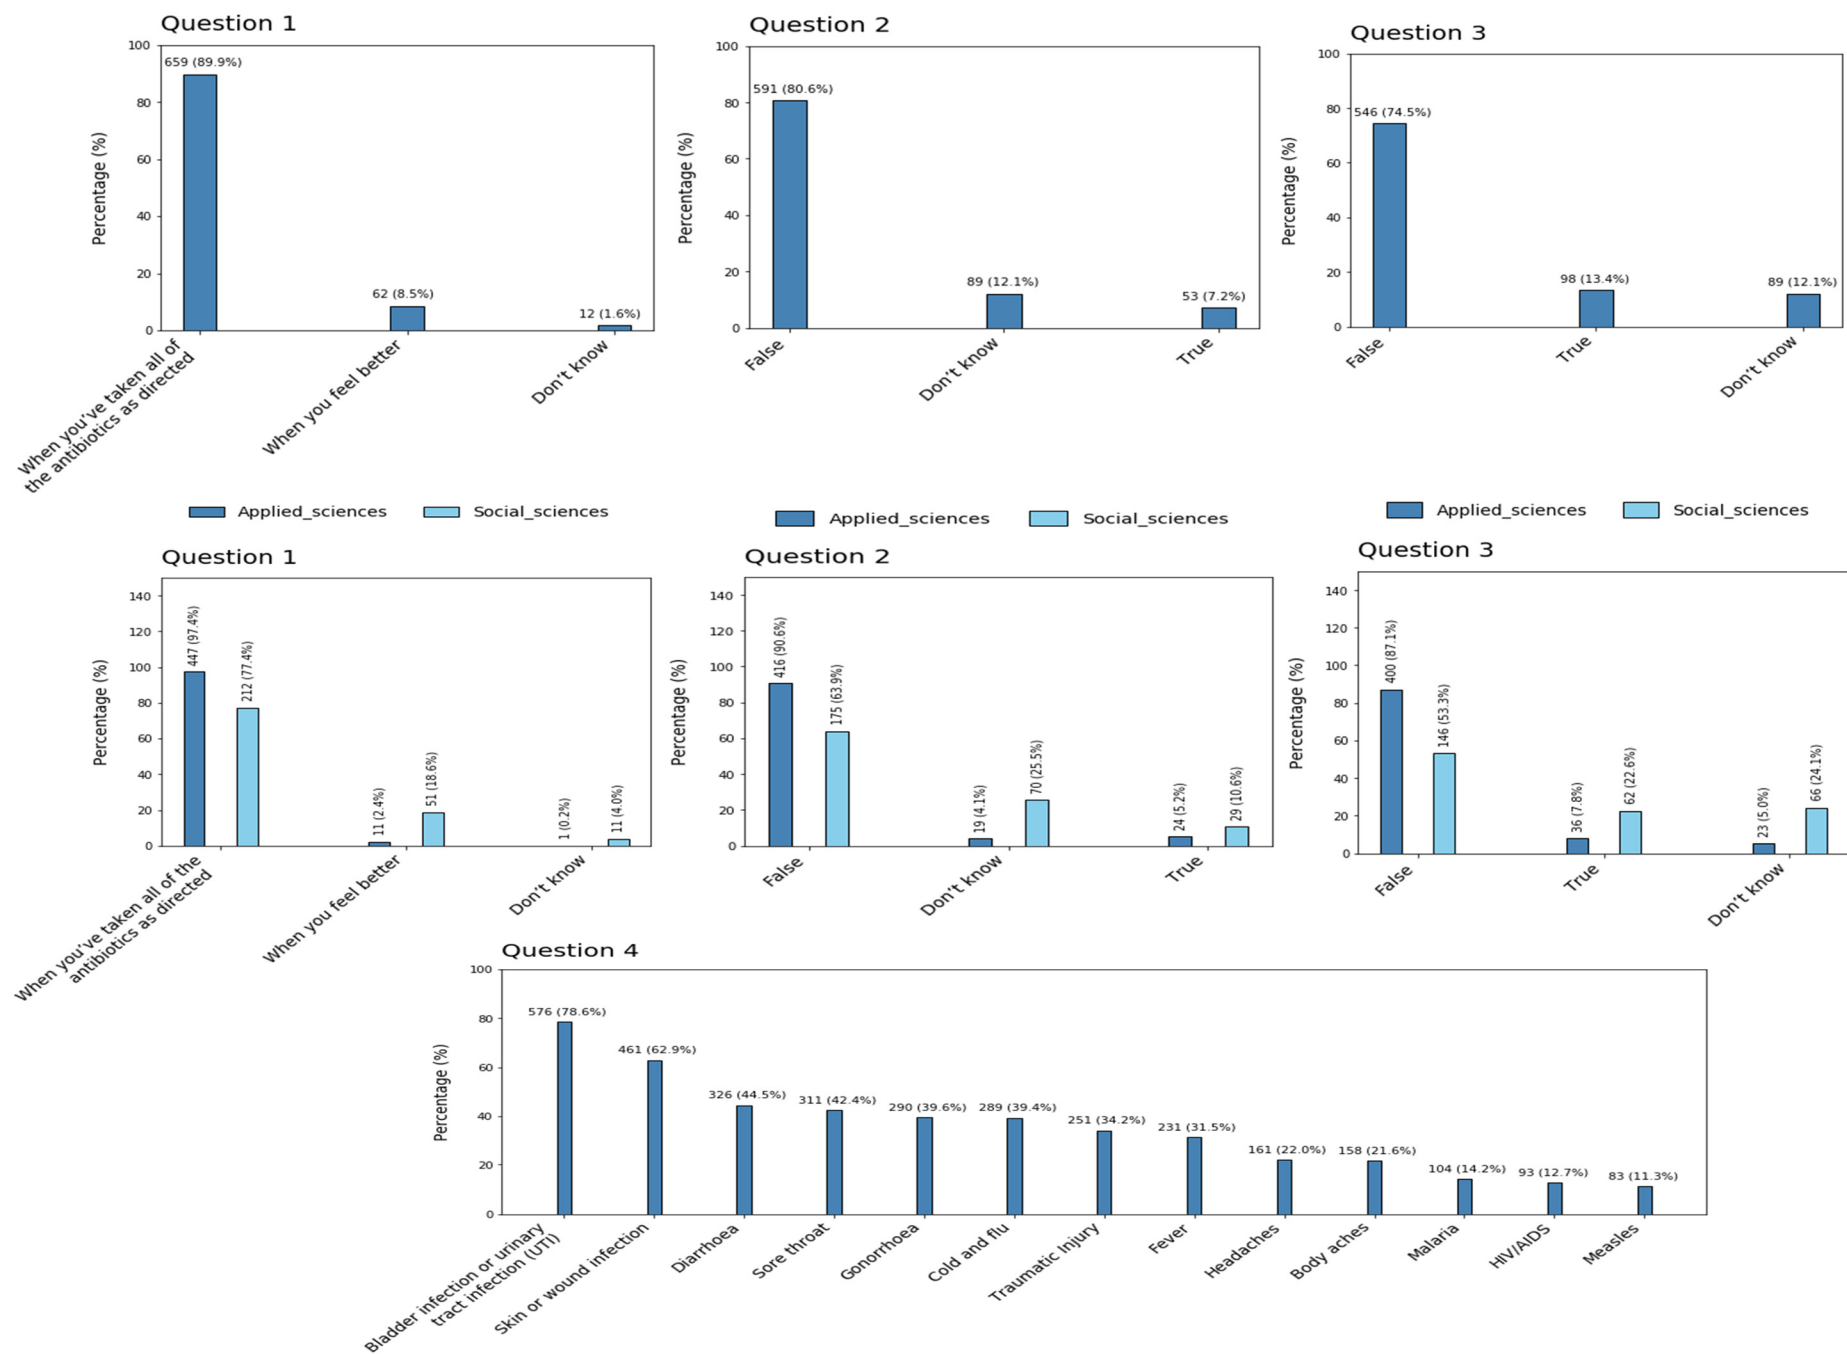

**Figure S1.** Percentages of selections by participants regarding knowledge of antibiotics. For Q1-Q3, the upper panels denote the total count. Questions available at Supplementary Materials, Survey.

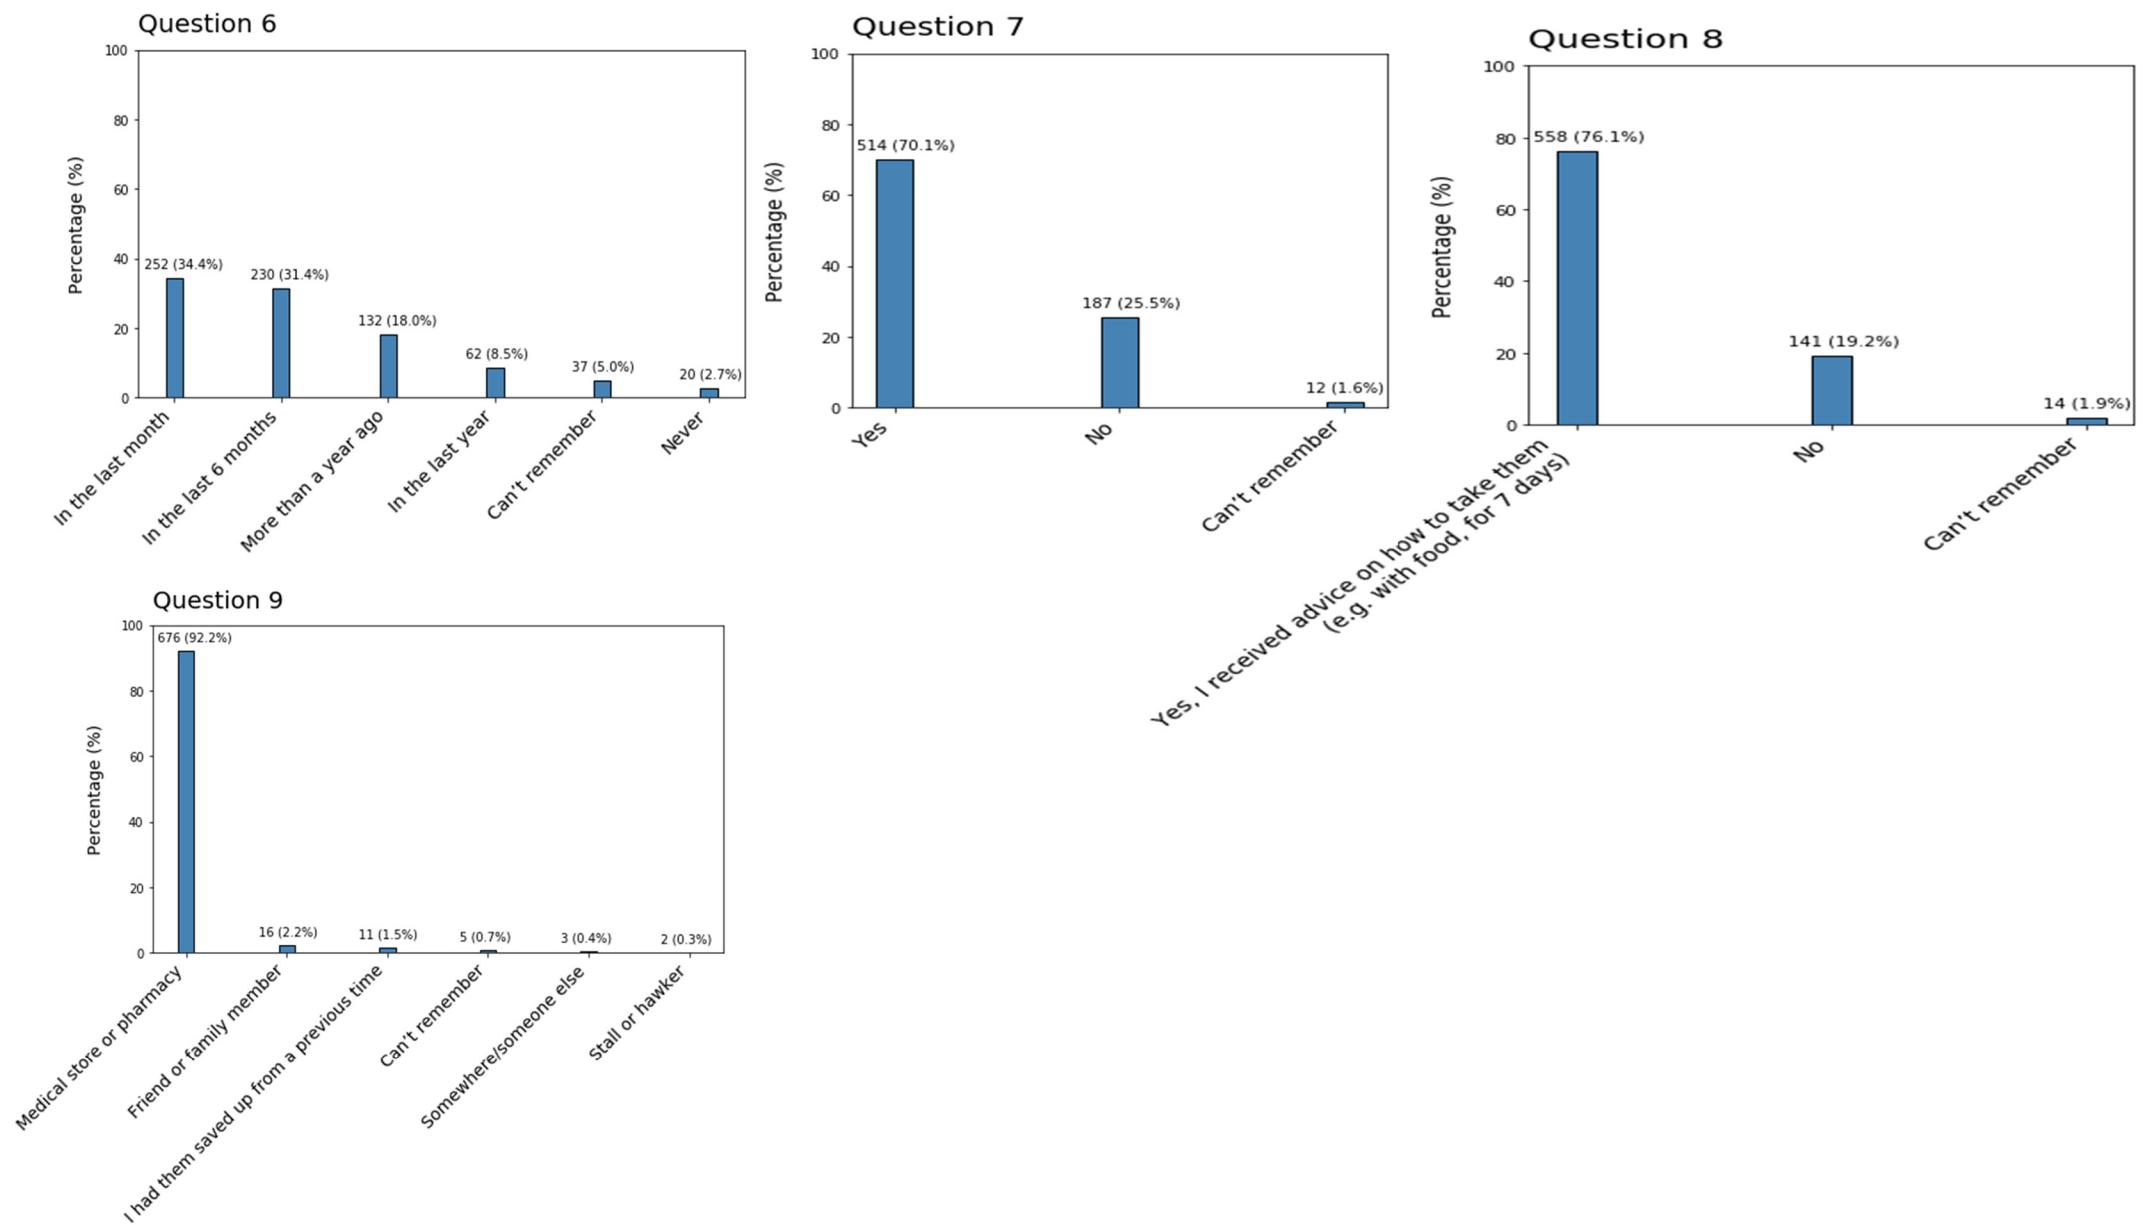

**Figure S2.** Percentages of selections by participants regarding knowledge use of antibiotics. Questions available at Supplementary Materials, Survey.

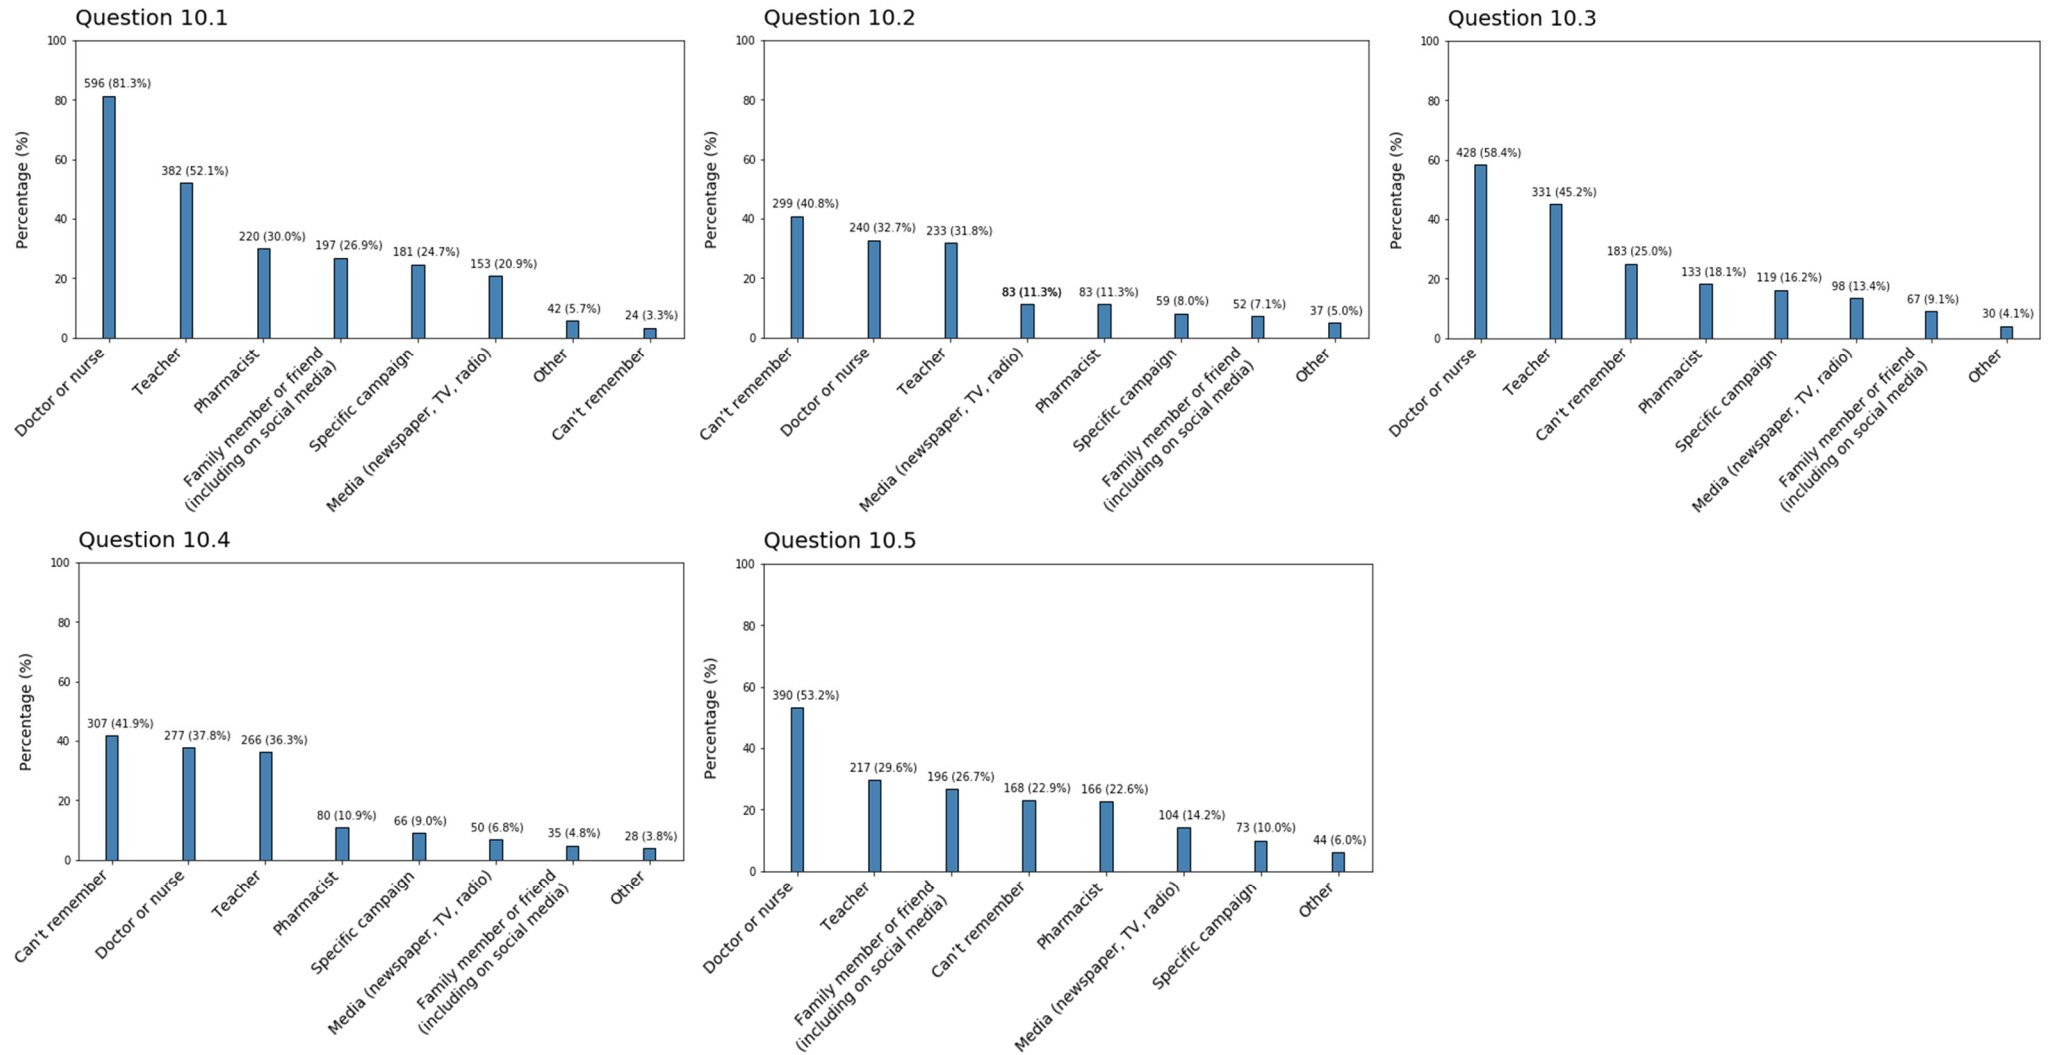

**Figure S3.** Percentages of selections by participants regarding sources of information of key terminology. Questions available at Supplementary Materials, Survey.
