# Supplementary material for: Antibiotic Resistance Awareness among Undergraduate Students in Quito, Ecuador
Source: Antibiotics (Basel). 2022 Feb 3;11(2):197. doi: 10.3390/antibiotics11020197 (PMC8868098; doi:10.3390/antibiotics11020197)
Supplement: Supplementary file 1 [file antibiotics-11-00197-s001.zip › Supplementary Materials, Table S1.Survey.xlsx]

## Sheet: Survey, encuesta
	Antibiotic Survey, English version									Encuesta de antibióticos, versión en Español
	Antibiotic Knowledge									Conocimiento de antibióticos
	(Q1) When do you think you should you stop taking antibiotics once you’ve begun treatment?									(P1) Una vez que haya comenzado el tratamiento, ¿Cuándo cree que debe dejar de tomar antibióticos? Una respuesta
	1. When you feel better									a. Cuando me sienta mejor
	2. When you’ve taken all of the antibiotics as directed									b. Cuando he tomado todos los antibióticos según las indicaciones
	3. Don’t know									c. No lo sé
	(Q2) Do you think this statement is ‘true’ or ‘false’?									(P2) ¿Cree que esta declaración es "verdadera" o "falsa"?
	“It’s okay to use antibiotics that were given to a friend or family member, as long as they were used to treat the same illness”									Es correcto usar antibióticos que se administraron a otro (un amigo o un miembro de la familia), siempre y cuando se hayan utilizado para tratar la misma enfermedad.
	1. True									a. Verdadero
	2. False									b. Falso
	3. Don’t know									c. No lo sé
	(Q3) Do you think this statement is ‘true’ or ‘false’?									(P3) ¿Cree que esta declaración es "verdadera" o "falsa"?
	“It’s okay to buy the same antibiotics, or request these from a doctor, if you’re sick and they helped you get better when you had the same symptoms before”									Es correcto comprar los mismos antibióticos, o solicitarlos a un médico, si está enfermo y lo ayudaron a combatir los mismos síntomas en el pasado.
	1. True									a. Verdadero
	2. False									b. Falso
	3. Don’t know									c. No lo sé
	(Q4) Do you think these conditions can be treated with antibiotics?									(P4) Cuál de las siguientes enfermedades / trastornos cree que pueden tratarse con antibióticos? (Más de una respuesta)
	1. HIV/AIDS									a. VIH / SIDA
	2. Gonorrhoea									b. Gonorrea
	3. Bladder infection or urinary tract infection (UTI)									c. Infección de la vejiga o infección del tracto urinario (ITU)
	4. Diarrhoea									d. Diarrea
	5. Cold and flu									e. Resfrío y gripe
	6. Fever									f. Fiebre
	7. Malaria									g. Malaria
	8. Measles									h. Sarampión
	9. Skin or wound infection									i. Infección de la piel
	10. Sore throat									j. Herida traumática
	11. Body aches									k. Dolor de garganta
	12. Headaches									l. Dolores en el cuerpo
	(Q5) Please indicate whether you think the following statements are ‘true’ or ‘false’									(P5) Indique si cree que las siguientes afirmaciones son "verdaderas" (V) o "falsas" (F)
	1. Antibiotic resistance occurs when your body becomes resistant to antibiotics and they no longer work as well									1. La resistencia a los antibióticos ocurre cuando su cuerpo se vuelve resistente a los antibióticos y ya no funcionan tan bien.
	2. Many infections are becoming increasingly resistant to treatment by antibiotics									2. Muchas infecciones son cada vez más resistentes al tratamiento con antibióticos.
	3. If bacteria are resistant to antibiotics, it can be very difficult or impossible to treat the infections they cause									3.Si las bacterias son resistentes a los antibióticos, puede ser muy difícil o imposible tratar las infecciones que causan.
	4. Antibiotic resistance is an issue that could affect me or my family									4.La resistencia a los antibióticos es un problema que podría afectar a mi familia o a mí.
	5. Antibiotic resistance is an issue in other countries but not here									5. La resistencia a los antibióticos es un problema en otros países, pero no en Ecuador.
	6. Antibiotic resistance is only a problem for people who take antibiotics regularly									6. La resistencia a los antibióticos es solo un problema para las personas que toman antibióticos regularmente.
	7. Bacteria which are resistant to antibiotics can be spread from person to person									7. Las bacterias que son resistentes a los antibióticos se pueden transmitir de persona a persona.
	8. Antibiotic-resistant infections could make medical procedures like surgery, organ transplants and cancer treatment much more dangerous									8. Las infecciones resistentes a los antibióticos podrían hacer que los procedimientos médicos como la cirugía, los trasplantes de órganos y el tratamiento del cáncer sean mucho más peligrosos.
	9. Antibiotics are widely used in agriculture (including in food-producing animals) in Ecuador?									9. En Ecuador, los antibióticos son ampliamente utilizados en la agricultura y en las granjas para la cría.
	Antibiotic Use									Uso de antibióticos
	(Q6) When did you last take antibiotics?									(P6) ¿Cuándo fue la última vez que tomó antibióticos? Una respuesta
	1. In the last month									a. En el último mes
	2. In the last 6 months									b. En los últimos 6 meses.
	3. In the last year									c. En el último año
	4. More than a year ago									d. Hace más de un año
	5. Never									e. Nunca
	6. Can’t remember									No puedo recordar
	(Q7) On that occasion, did you get the antibiotics (or a prescription for them) from a doctor or nurse?									(P7) En esa ocasión, ¿recibió los antibióticos de un médico? Una respuesta
	1. Yes									a. Sí
	2. No									b. No
	3. Can’t remember									c. No puedo recordar
	(Q8) On that occasion, did you get advice from a doctor, nurse or pharmacist on how to take them?									(P8) En esa ocasión, ¿recibió asesoramiento de un médico o enfermera sobre cómo tomarlos (por ejemplo, antes o después de las comidas, durante 7 días, etc.)? Una respuesta
	1. Yes, I received advice on how to take them (e.g. with food, for 7 days)									a. Sí
	2. No									b. No
	3. Can’t remember									c. No puedo recordar
	(Q9) On that occasion, where did you get the antibiotics?									(P9) En esa ocasión, ¿de dónde consiguió los antibióticos? Una respuesta
	1. Medical store or pharmacy									a. Farmacia.
	2. Stall or hawker									b. Puesto o vendedor ambulante
	3. The internet									c. Por internet
	4. Friend or family member									d. Amigo o familiar
	5. I had them saved up from a previous time									e. Los tuve guardados de una vez anterior
	6. Somewhere/someone else									f. En algún lugar / alguien más
	7. Can’t remember									g. No puedo recordar
	Sources of Information									Fuentes de Información
	(Q10.1) Where did you hear about the term: ‘Antibiotic Resistance’?									(P10.1) ¿A quién ha escuchado el término Resistencia a los antibióticos? (Puede escoger más de una respuesta).
	1. Doctor or nurse									a. Doctor o enfermera
	2. Pharmacist									b. Profesor/docente
	3. Family member or friend (including on social media)									c. Farmacéutico
	4. Media (newspaper, TV, radio)									d. Miembro de la familia o amigo
	5. Specific campaign									e. Medios de comunicación (periódicos, TV, radio)
	6. Other									f. Campañas especificas
	7. Can’t remember									g. Otros
	(Q10.2) Where did you hear about the term: ‘Superbugs’?									(P10.2) ¿A quién ha escuchado el término Superbacteria? (Puede escoger más de una respuesta).
	1. Doctor or nurse									a. Doctor o enfermera
	2. Pharmacist									b. Profesor/docente
	3. Family member or friend (including on social media)									c. Farmacéutico
	4. Media (newspaper, TV, radio)									d. Miembro de la familia o amigo
	5. Specific campaign									e. Medios de comunicación (periódicos, TV, radio)
	6. Other									f. Campañas especificas
	7. Can’t remember									g. Otros
	(Q10.3) Where did you hear about the term: ‘Antimicrobial resistance’?									(P10.3) ¿A quién ha escuchado el término Resistencia Antimicrobiana? (Puede escoger más de una respuesta).
	1. Doctor or nurse									a. Doctor o enfermera
	2. Pharmacist									b. Profesor/docente
	3. Family member or friend (including on social media)									c. Farmacéutico
	4. Media (newspaper, TV, radio)									d. Miembro de la familia o amigo
	5. Specific campaign									e. Medios de comunicación (periódicos, TV, radio)
	6. Other									f. Campañas especificas
	7. Can’t remember									g. Otros
	(Q10.4) Where did you hear about the term: ‘AMR’?									(P10.4) ¿A quién ha escuchado el término RAM o AMR? (Puede escoger más de una respuesta).
	1. Doctor or nurse									a. Doctor o enfermera
	2. Pharmacist									b. Profesor/docente
	3. Family member or friend (including on social media)									c. Farmacéutico
	4. Media (newspaper, TV, radio)									d. Miembro de la familia o amigo
	5. Specific campaign									e. Medios de comunicación (periódicos, TV, radio)
	6. Other									f. Campañas especificas
	7. Can’t remember									g. Otros
	(Q10.5) Where did you hear about the term: ‘Drug resistance’?									(P10.5) ¿A quién ha escuchado el término Resistencia a las medicinas? (Puede escoger más de una respuesta).
	1. Doctor or nurse									a. Doctor o enfermera
	2. Pharmacist									b. Profesor/docente
	3. Family member or friend (including on social media)									c. Farmacéutico
	4. Media (newspaper, TV, radio)									d. Miembro de la familia o amigo
	5. Specific campaign									e. Medios de comunicación (periódicos, TV, radio)
	6. Other									f. Campañas especificas
	7. Can’t remember									g. Otros
	(Q10.6) Where did you hear about the term: ‘Antibiotic-resistant bacteria’?									(P10.6) ¿A quién ha escuchado el término Bacterias resistentes a los antibióticos? (Puede escoger más de una respuesta).
	1. Doctor or nurse									a. Doctor o enfermera
	2. Pharmacist									b. Profesor/docente
	3. Family member or friend (including on social media)									c. Farmacéutico
	4. Media (newspaper, TV, radio)									d. Miembro de la familia o amigo
	5. Specific campaign									e. Medios de comunicación (periódicos, TV, radio)
	6. Other									f. Campañas especificas
	7. Can’t remember									g. Otros
	Attitutes									Actitudes
	(Q11) On the scale shown, how much do you agree the following actions would help address the problem of antibiotic resistance?		Agree Strongly	Agree Slightly	Neither agree nor disagree	Disagree Slightly	Disagree Strongly			(P11) En la escala que se muestra, ¿en qué medida está de acuerdo con que las siguientes acciones ayudarían a abordar el problema de la resistencia a los antibióticos?		Totalmente de acuerdo Poco de acuerdo Ni de acuerdo ni en desacuerdo En desacuerdo Un poco en desacuerdo Muy en desacuerdo	Poco de acuerdo	Ni de acuerdo ni en desacuerdo	Un poco en desacuerdo	Muy en desacuerdo
	1	People should use antibiotics only when they are prescribed by a doctor or nurse	5	4	3	2	1			1	Las personas deben usar antibióticos solo cuando los prescriba un médico o una enfermera.	5	4	3	2	1
	2	Farmers should give fewer antibiotics to food-producing animals	5	4	3	2	1			2	Los agricultores deberían administrar menos antibióticos a los animales productores de alimentos	5	4	3	2	1
	3	People should not keep antibiotics and use them later for other illnesses	5	4	3	2	1			3	Las personas no deben conservar antibióticos y usarlos más tarde para otras enfermedades.	5	4	3	2	1
	4	Parents should make sure all of their children’s vaccinations are up-to-date	5	4	3	2	1			4	Los padres deben asegurarse de que todas las vacunas de sus hijos estén actualizadas	5	4	3	2	1
	5	People should wash their hands regularly	5	4	3	2	1			5	Las personas deben lavarse las manos con regularidad.	5	4	3	2	1
	6	Doctors should only prescribe antibiotics when they are needed	5	4	3	2	1			6	Los médicos solo deben recetar antibióticos cuando sean necesarios	5	4	3	2	1
	7	Governments should reward the development of new antibiotics	5	4	3	2	1			7	Los gobiernos deberían recompensar el desarrollo de nuevos antibióticos	5	4	3	2	1
	8	Pharmaceutical companies should develop new antibiotics	5	4	3	2	1			8	Las empresas farmacéuticas deberían desarrollar nuevos antibióticos	5	4	3	2	1
	(Q12) On the scale shown, how much do you agree with following statements?		Agree Strongly	Agree Slightly	Neither agree nor disagree	Disagree Slightly	Disagree Strongly			(P12) En la escala que se muestra, ¿en qué medida está de acuerdo con las siguientes afirmaciones?		Totalmente de acuerdo Poco de acuerdo Ni de acuerdo ni en desacuerdo En desacuerdo Un poco en desacuerdo Muy en desacuerdo	Poco de acuerdo	Ni de acuerdo ni en desacuerdo	Un poco en desacuerdo	Muy en desacuerdo
	1	Antibiotic resistance is one of the biggest problems the world faces	5	4	3	2	1			1	La resistencia a los antibióticos es uno de los mayores problemas que enfrenta el mundo	5	4	3	2	1
	2	Medical experts will solve the problem of antibiotic resistance before it becomes too serious	5	4	3	2	1			2	Los expertos médicos resolverán el problema de la resistencia a los antibióticos antes de que se vuelva demasiado grave	5	4	3	2	1
	3	Everyone needs to take responsibility for using antibiotics responsibly	5	4	3	2	1			3	Todos deben asumir la responsabilidad de usar antibióticos de manera responsable	5	4	3	2	1
	4	There is not much people like me can do to stop antibiotic resistance	5	4	3	2	1			4	No hay mucho que la gente como yo pueda hacer para detener la resistencia a los antibióticos.	5	4	3	2	1
	5	I am worried about the impact that antibiotic resistance will have on my health, and that of my family	5	4	3	2	1			5	Me preocupa el impacto que tendrá la resistencia a los antibióticos en mi salud y en la de mi familia.	5	4	3	2	1
	6	I am not at risk of getting an antibiotic-resistant infection, as long as I take my antibiotics correctly.	5	4	3	2	1			6	No corro el riesgo de contraer una infección resistente a los antibióticos, siempre que tome mis antibióticos correctamente.	5	4	3	2	1
